# Supplementary material for: A Collection of Target Mimics for Comprehensive Analysis of MicroRNA Function in Arabidopsis thaliana
Source: PubMed Central journal article supplement (PMC2908682; doi:10.1371/journal.pgen.1001031), 2010-07-22
Supplement: pgen.1001031.s004.pdf [file pgen.1001031.s004.pdf]

**Supplementary Table 1.** Oligonucleotide primers used to modify the *IPS1* sequence in *MIM* constructs.

| Construct         | Primer | Sequence (5' - 3')                             |
|-------------------|--------|------------------------------------------------|
| <b>MIM156</b>     | I      | ctTGACAGAAGATAGAAGTGAGCATtttctagaggagataa      |
|                   | II     | aaATGCTCACTTCTATCTTCTGTCAagcttcggttcccctcg     |
| <b>MIM157</b>     | I      | gaaccgaagctTTGACAGAAGTCGATAGAGAGCACtttctagagg  |
|                   | II     | cctctagaaaGTGCTCTCTATCGACTTCTGTCAAagcttcggttc  |
| <b>MIM158</b>     | I      | ctTCGATAAACCAGATCTGCATCCAgtttctagaggagataa     |
|                   | II     | aaTGCTTTGTCTCAAACATTTGGGAagcttcggttcccctcg     |
| <b>MIM159</b>     | I      | gaaccgaagctTTTGGATTGATTGAGGGAGCTCTTtttctagagg  |
|                   | II     | cctctagaaaAAGAGCTCCCTCAATCAATCCAAAagcttcggttc  |
| <b>MIM160</b>     | I      | aaTGGCATAACAGTCTAGAGCCAGGCAagcttcggttcccctcg   |
|                   | II     | ctTGCCTGGCTCTAGACTGTATGCCAttctagaggagataa      |
| <b>MIM161a.1</b>  | I      | gaaccgaagctTTGAAAGTGACGAACACATCGGGGtttctagagg  |
|                   | II     | cctctagaaaaCCCGATGTGTTTCGTCACCTTTCAAgcttcggttc |
| <b>MIM161a.2</b>  | I      | gaaccgaagctTCAATGCATTTCTAAAAGTACTAttctagagg    |
|                   | II     | cctctagaaaTAGTCACTTTTAGAAATGCATTGAagcttcggttc  |
| <b>MIM162</b>     | I      | ctTCGATAAACCAGATCTGCATCCAgtttctagaggagataa     |
|                   | II     | aaCTGGATGCAGATCTGGTTTATCGAagcttcggttcccctcg    |
| <b>MIM163</b>     | I      | ctTTGAAGAGGATTGATTGGAACCTCGATtttctagaggagataa  |
|                   | II     | aaATCGAAGTTCCAATCAATCCTCTTCAAagcttcggttcccctcg |
| <b>MIM164</b>     | I      | ctTGGAGAAGCATAGGGGCACGTGCAttctagaggagataa      |
|                   | II     | aaTGCACGTGCCCTATGCTTCTCCAagcttcggttcccctcg     |
| <b>MIM165/166</b> | I      | ctTCGGACCAGGTAGATTCAATCCCCtttctagaggagataa     |
|                   | II     | aaGGGGAATGAATCTACCTGGTCCGAagcttcggttcccctcg    |
| <b>MIM167</b>     | I      | gaaccgaagctTGAAGCTGCCTTGAGCATGATCTAttctagagg   |
|                   | II     | ctctagaaaTAGATCATGCTCAAGGCAGCTTCAagcttcggttc   |
| <b>MIM168</b>     | I      | ctTCGCTTGGTGTTTAAGGTCGGGAAttctagaggagataa      |
|                   | II     | aaTTCCCGACCTTAAACACCAAGCGAagcttcggttcccctcg    |
| <b>MIM169</b>     | I      | ctTAGCCAAGGAGCACGACTTGCCGAttctagaggagataa      |
|                   | II     | aaTCGGCAAGTCGTGCTCCTTGCTAagcttcggttcccctcg     |
| <b>MIM169defg</b> | I      | ctTGAGCCAAGGTAGGTGACTTGCCGtttctagaggagataa     |
|                   | II     | aaCGGCAAGTCACCTACCTTGCTCAagcttcggttcccctcg     |
| <b>MIM170</b>     | I      | ctTGATTGAGCCTTTATGTCAATATCtttctagaggagataa     |
|                   | II     | aaGATATTGACATAAAGGCTCAATCAagcttcggttcccctcg    |
| <b>MIM171a</b>    | I      | ctTGATTGAGCCTTTACGCCAATATCtttctagaggagataa     |
|                   | II     | aaGATATTGGCGTAAAGGCTCAATCAagcttcggttcccctcg    |
| <b>MIM171bc</b>   | I      | ctGTTAGCCGTGTTTACAATATCACGtttctagaggagataa     |
|                   | II     | aaCGTGATATTGTAAACACGGCTAACagcttcggttcccctcg    |

|                 |    |                                                |
|-----------------|----|------------------------------------------------|
| <b>MIM172</b>   | I  | ctAGAATCTTGAACCTCGATGCTGCATtttctagaggagataa    |
|                 | II | aaATGCAGCATCGAGTTCAAGATTCTagcttcggtcccctcg     |
| <b>MIM172cs</b> | I  | ctAGAATCTTGATAGAGATGCAGCTCtttctagaggagataa     |
|                 | II | aaGAGCTGCATCTCTATCAAGATTCTagcttcggtcccctcg     |
| <b>MIM172ns</b> | I  | ccgaagctAGAATCTTGAGGATGCTGCATtttctagagg        |
|                 | II | ctagaaaTGCAGCATCCTCAAGATTCTagcttcggttc         |
| <b>MIM173</b>   | I  | gaaccgaagctTTCGCTTGCATTCGAGAGAAATCACtttctagagg |
|                 | II | cctctagaaaGTGATTTCTCTCGAATGCAAGCGAAgcttcggttc  |
| <b>MIM319</b>   | I  | ctTTGGACTGAATAGAGGAGCTCCTtttctagaggagataa      |
|                 | II | aaAGGAGCTCCTCTATTCAGTCCAAgcttcggtcccctcg       |
| <b>MIM390</b>   | I  | ctAAGCTCAGGATAGAGGATAGCGCCTtttctagaggagataa    |
|                 | II | aaGGCGCTATCCTCTATCCTGAGCTTtagcttcggtcccctcg    |
| <b>MIM391</b>   | I  | ctTTCGCAGGAGTAGTGATAGCGCCAttctagaggagataa      |
|                 | II | aaTGGCGCTATCACTACTCCTGCGAAgcttcggtcccctcg      |
| <b>MIM393</b>   | I  | ctTCCAAAGGGAGGGCCGCATTGATCCTtttctagaggagataa   |
|                 | II | aaGGATCAATGCGGCCCTCCCTTTGGAagcttcggtcccctcg    |
| <b>MIM394</b>   | I  | ctTTGGCATTCTTAAGTCCACCTCCTtttctagaggagataa     |
|                 | II | aaGGAGGTGGACTTAAGAATGCCAAgcttcggtcccctcg       |
| <b>MIM395</b>   | I  | ctCTGAAGTGTTAAGCGGGGAACTCtttctagaggagataa      |
|                 | II | aaGAGTTCCCCGCTTAACACTTCAGagcttcggtcccctcg      |
| <b>MIM396</b>   | I  | ctTTCCACAGCTAAGCTCTTGAACCTGtttctagaggagataa    |
|                 | II | aaCAGTTCAAGAGCTTAGCTGTGGAAgcttcggtcccctcg      |
| <b>MIM397</b>   | I  | ctTCATTGAGTGAAAATCGTTGATGtttctagaggagataa      |
|                 | II | aaCATCAACGATTTTACACTCAATGAagcttcggtcccctcg     |
| <b>MIM398</b>   | I  | ctTGTGTTCTCATTGAGTCACCCTGtttctagaggagataa      |
|                 | II | aaCAGGGTGACTCAATGAGAACACAagcttcggtcccctcg      |
| <b>MIM400</b>   | I  | gaaccgaagctTATGAGAGTAGAACTATAAGACAAttctagagg   |
|                 | II | cctctagaaaGTGTCTTATAGTTCTACTCTCATAgcttcggttc   |
| <b>MIM401</b>   | I  | ctCGAAACTGGTTAGATCGACCGACAttctagaggagataa      |
|                 | II | aaTGTCGGTTCGATCTAACCAGTTTCGagcttcggtcccctcg    |
| <b>MIM402</b>   | I  | ctTTCGAGGCCTGGGATTAACCTCTGtttctagaggagataa     |
|                 | II | aaCAGAGGTTTAATCCCAGGCCTCGAAgcttcggtcccctcg     |
| <b>MIM403</b>   | I  | ctTTAGATTCACTTGACACAAACTCGtttctagaggagataa     |
|                 | II | aaCGAGTTTGTGTCAAGTGAATCTAAgcttcggtcccctcg      |
| <b>MIM404</b>   | I  | ctATTAACGCTGTTACAGGTTGCGGCAGCtttctagaggagataa  |
|                 | II | aaGCTGCCGCAACCGTGAACAGCGTTAATagcttcggtcccctcg  |
| <b>MIM405</b>   | I  | ctATGAGTTGGGAACCCTAACCCATAACTtttctagaggagataa  |
|                 | II | aaAGTTATGGGTTAGGGTCCCAACTCATagcttcggtcccctcg   |
| <b>MIM406</b>   | I  | ctTAGAATGCTAGAGCTGTAATCCAGtttctagaggagataa     |
|                 | II | aaCTGGATTACAGCTCTAGCATTCTAagcttcggtcccctcg     |
| <b>MIM407</b>   | I  | ctTTTAAATCATGGGGTACTTTTGGTtttctagaggagataa     |

|               |    |                                               |
|---------------|----|-----------------------------------------------|
|               | II | aaACCAAAAGTACCCCATGATTTAAAgcttcggtcccctcg     |
| <b>MIM408</b> | I  | ctATGCACTGCCAAGCCTTCCCTGGCtttctagaggagataa    |
|               | II | aaGCCAGGGAAGGCTTGGCAGTGCATagcttcggtcccctcg    |
| <b>MIM413</b> | I  | ctATAGTTTCTCAAGCTGTTCTGCACtttctagaggagataa    |
|               | II | aaGTGCAGAACAGCTTGAGAACTATagcttcggtcccctcg     |
| <b>MIM414</b> | I  | ctTCATCTTCATTAGAATCATCGTCAAttctagaggagataa    |
|               | II | aaTGACGATGATTCTAATGAAGATGAagcttcggtcccctcg    |
| <b>MIM415</b> | I  | ctAACAGAGCAGTTCCAACAGAACATtttctagaggagataa    |
|               | II | aaATGTTCTGTTGGAAGTCTGCTGTTagcttcggtcccctcg    |
| <b>MIM416</b> | I  | ctGGTTCGTACGAAGAACAAGTCTGTTCAAttctagaggagataa |
|               | II | aaTGAACAGTGTTCCTTCGTACGAACCagcttcggtcccctcg   |
| <b>MIM417</b> | I  | ctGAAGGTAGTGATAATTTGTTTCGAttctagaggagataa     |
|               | II | aaTCGAACAAATTATACACTACCTTCagcttcggtcccctcg    |
| <b>MIM418</b> | I  | ctTAATGTGATGTTTATGAACTGACCtttctagaggagataa    |
|               | II | aaGGTCAGTTCATAAACATCACATTAagcttcggtcccctcg    |
| <b>MIM419</b> | I  | ctTTATGAAGGCAAGAGAGGATGTTGtttctagaggagataa    |
|               | II | aaCAACATCCTCTCTTGCCTTCATAAagcttcggtcccctcg    |
| <b>MIM420</b> | I  | ctTAAACTAATCTTGGCGGAAATGCAttctagaggagataa     |
|               | II | aaTGCATTTCCGCCAAGATTAGTTTAagcttcggtcccctcg    |
| <b>MIM426</b> | I  | ctTTTTGGAAATAAGAGGTCCTTACGtttctagaggagataa    |
|               | II | aaCGTAAGGACCTCTTATTTCCAAAagcttcggtcccctcg     |
| <b>MIM427</b> | I  | ctTTTTTCCTACAAGACCGCCCATACtttctagaggagataa    |
|               | II | aaGGTATGGGCGGTCTTGTAGGAAAAAagcttcggtcccctcg   |
| <b>MIM447</b> | I  | ctTTGGGGACGACTTAATGTTTTGTTGtttctagaggagataa   |
|               | II | aaCAACAAAACATTAAGTCGTCCCAAagcttcggtcccctcg    |
| <b>MIM771</b> | I  | ctTGAGCCTCTGAAACGGTAGCCCTCtttctagaggagataa    |
|               | II | aaGAGGGCTACCGTTTCAGAGGCTCAagcttcggtcccctcg    |
| <b>MIM772</b> | I  | ctTTTTTCCTACATGACCGCCCATACtttctagaggagataa    |
|               | II | aaGTATGGGCGGTTCATGTAGGAAAAAagcttcggtcccctcg   |
| <b>MIM773</b> | I  | ctTTTGCTTCCATAGACTTTTGTCTCtttctagaggagataa    |
|               | II | aaGAGACAAAAGTCTATGGAAGCAAAagcttcggtcccctcg    |
| <b>MIM774</b> | I  | ctTTGGTTACCCTAGTTATGGCCATCtttctagaggagataa    |
|               | II | aaGATGGCCATAACTAGGTAACCAAagcttcggtcccctcg     |
| <b>MIM775</b> | I  | ctTTCGATGTCTTCGTGCAGTGCCAAtttctagaggagataa    |
|               | II | aaTTGGCACTGCACGAAGACATCGAAagcttcggtcccctcg    |
| <b>MIM776</b> | I  | ctTCTAAGTCTTTAGATATTGATGTTtttctagaggagataa    |
|               | II | aaAACATCAATATCTAAAGACTTAGAagcttcggtcccctcg    |
| <b>MIM777</b> | I  | ctTACGCATTGATAGATTTTCGTTGCTtttctagaggagataa   |
|               | II | aaAGCAACGAAATCTATCAATGCGTAagcttcggtcccctcg    |
| <b>MIM778</b> | I  | ctTGGCTTGGTTATGAATGTACACCGtttctagaggagataa    |
|               | II | aaCGGTGTACATTCATAACCAAGCCAagcttcggtcccctcg    |

|               |    |                                                 |
|---------------|----|-------------------------------------------------|
| <b>MIM779</b> | I  | ctTTCTGCTATGATGATGCTGCTCATtttctagaggagataa      |
|               | II | aaATGAGCAGCATCATCATAGCAGAAagcttcggtcccctcg      |
| <b>MIM780</b> | I  | ctTTTCTTCGTGTAGTATATCTGGCAttctagaggagataa       |
|               | II | aaTGCCAGATATACTACACGAAGAAAagcttcggtcccctcg      |
| <b>MIM781</b> | I  | ctTTAGAGTTTTTATAGATGGATACTTAttctagaggagataa     |
|               | II | aaTAAGTATCCATCTAAAACTCTAAagcttcggtcccctcg       |
| <b>MIM782</b> | I  | ctACAAACACCTATGAGGATGTTCTTtttctagaggagataa      |
|               | II | aaAAGAACATCCTCATAGGTGTTTGTAgcttcggtcccctcg      |
| <b>MIM783</b> | I  | ctAAGCTTTGCTTAGAGTTCATGTTTcttctagaggagataa      |
|               | II | aaGAACATGAAGCTAAGCAAAGCTTAgcttcggtcccctcg       |
| <b>MIM823</b> | I  | gaaccgaagctTGGGTGGTGAGGGTCATATAAGATtttctagagg   |
|               | II | cctctagaaaATCTTATATGACCCTCACCAAGCTtcggttc       |
| <b>MIM824</b> | I  | gaaccgaagctTAGACCATTTAAAGTGAGAAGGGAttctagagg    |
|               | II | cctctagaaaTCCCTTCTCACTTTAAATGGTCTAagcttcggttc   |
| <b>MIM828</b> | I  | gaaccgaagctTCTTGCTTAATTGATGAGTATTCCAAttctagagg  |
|               | II | cctctagaaaTGAATACTCATCAATTAAGCAAGAagcttcggttc   |
| <b>MIM834</b> | I  | gaaccgaagctTGGTAGCAGTGGGAGCGGTGGTAAttctagagg    |
|               | II | cctctagaaaTTACCACCGCTCCCACTGCTACCAagcttcggttc   |
| <b>MIM838</b> | I  | gaaccgaagctTTTTCTTCTATTGCTTCTTGCACAttctagagg    |
|               | II | cctctagaaaTGTGCAAGAAGCAATAGAAGAAAAagcttcggttc   |
| <b>MIM841</b> | I  | gaaccgaagctTACGAGCCACAAGTTGAAACTGAAAttctagagg   |
|               | II | cctctagaaaTTCAGTTTCAACTTGTGGCTCGTAagcttcggttc   |
| <b>MIM847</b> | I  | gaaccgaagctTCACTCCTCTAAGTCTTCTTGATGtttctagagg   |
|               | II | cctctagaaaCATCAAGAAGACTTAGAGGAGTGAagcttcggttc   |
| <b>MIM858</b> | I  | gaaccgaagctTTCGTTGTCTAAAGTTCGACCTTgtttctagagg   |
|               | II | cctctagaaaCAAGGTCGAACTTTAGACAACGAAagcttcggttc   |
| <b>MIM859</b> | I  | gaaccgaagctTCGAACTCATAAGCTTTGGTGCTtttctagagg    |
|               | II | cctctagaaaGACACCAAAGCTTATGAGTTCGAagcttcggttc    |
| <b>MIMB</b>   | I  | gaaccgaagctTTAGTAACAGATTCATCTTTGATTGtttctagagg  |
|               | II | cctctagaaaCCAATCAAAGATGAATCTGTTACTAAagcttcggttc |
| <b>MIMH</b>   | I  | gaaccgaagctTCTCTCTGTTAAAGTGAAGTCAAattctagagg    |
|               | II | cctctagaaaTTTGAAGTTCCTTTAACAGAGAGAagcttcggttc   |

Nucleotides complementary to the targeted miRNA are shown in upper case. *MIMB* and *MIMH* target the putative miRNAs candidates B and H, as described in [33].
