# Supplementary material for: Jura-Savoie-Bugey. Soulever des montagnes...pour en sortir
Source: PLOS journal article supplement (doi:10.1371/journal.pgen.1001031), 2003-01-01
Supplement: S1 (10.1371/journal.pgen.1001031.s001) [file journal.pgen.1001031.s001]

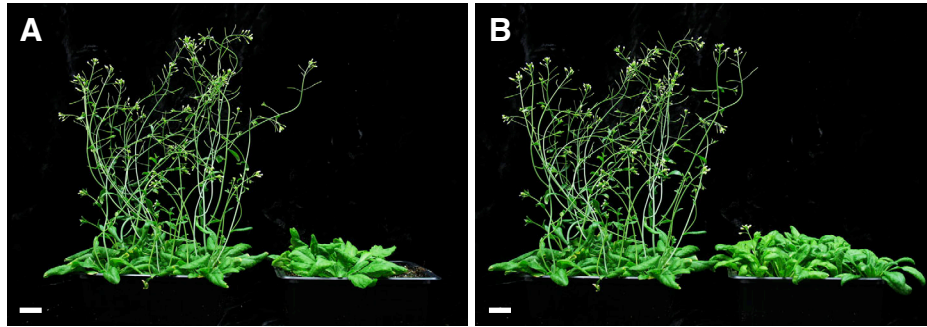

**Supplementary Figure 1. Flowering behavior of *MIM167* and *MIM172* plants.**

Five-week old, long-day grown plants expressing *MIM167* (A) and *MIM172* (B) next to wild type Col-0 plants on the left.
