# Supplementary material for: A Collection of Target Mimics for Comprehensive Analysis of MicroRNA Function in Arabidopsis thaliana
Source: PLoS Genet. 2010 Jul 22;6(7):e1001031. doi: 10.1371/journal.pgen.1001031 (PMC2908682; doi:10.1371/journal.pgen.1001031)
Supplement: Table S2 — Oligonucleotide primers for qRT-PCR. (0.07 MB PDF) [file pgen.1001031.s005.pdf]

**Supplementary Table 2.** Oligonucleotide primers for qRT-PCR.

| MiRNA     | Target gene      | Primer* | Sequence                            |
|-----------|------------------|---------|-------------------------------------|
| miR160    | <i>ARF10</i>     | F       | CGTTAAGCGGGTTAGTCCG                 |
|           |                  | R       | CCTGAACCATAGCAGGATTC                |
| miR164    | <i>CUC1</i>      | F       | GAAGAGTTGTTGGGTCATGC                |
|           |                  | R       | CGAAATCAATCTGTCCCGATG               |
| miR165/6  | <i>PHB</i>       | F       | GTCTATGAGAATGGCCACATG               |
|           |                  | R       | GTAGGAGCATACTGCGTG                  |
| miR169    | <i>HAP2C</i>     | F       | AACTCCGATAAACCGAGCC                 |
|           |                  | R       | TCTTGGTCGTTCTTGATGTC                |
| miRs170/1 | <i>At3g60630</i> | F       | GGATCTCAACACCTCCAGTG                |
|           |                  | R       | GAGACGGTGGTGATAATGATG               |
| miR172    | <i>AP2</i>       | F       | CGGGCAGCAGCAACATTGGTAGCGGA          |
|           |                  | R       | AGAGGAGGTTGGAAGCCATTTGTCTGC         |
| miR390/1  | <i>TAS3</i>      | F       | AAACTGCAGAGAAAAACGTCAACTTCTTTATTGAA |
|           |                  | R       | AAAGAATCCTTCTTCGGCATTCCAGTTTC       |
| miR393    | <i>TIR1</i>      | F       | CTCTCTATCTGGCCTCTTGAC               |
|           |                  | R       | CAGGCATGTCAAATCGAGGAC               |
| miR394    | <i>At1g27340</i> | F       | CTATCCACAGCACACTTTAC                |
|           |                  | R       | CACAGCATTGTAGGTTATCAG               |
| miR775    | <i>At1g53290</i> | F       | GCGTTGTTAGTGGCGAAAAG                |
|           |                  | R       | CATCCTAGGTACGTCTGAG                 |
| miR776    | <i>At5g62310</i> | F       | CACTGGACTTCATGATTGAGC               |
|           |                  | R       | CCATTCAAGTACTCCATGACC               |

\*F, forward; R, reverse.
